# Supplementary material
Source: PubMed Central journal article supplement (PMC3309363)
Supplement: ismej2011155x4.pdf [file ismej2011155x4.pdf]

**Table S1:** List of specimens used to determine host associations of *Amanita phalloides*

| Region                       | Site Name                        | Sample ID*              | City/<br>Municipality | State/Province/Region | Country | Collector     | Date       | Species<br>ID                                  |
|------------------------------|----------------------------------|-------------------------|-----------------------|-----------------------|---------|---------------|------------|------------------------------------------------|
| <b>WEST<br/>COAST<br/>US</b> | Albany Hill                      | AP: AlbanyHill2007_2    | Albany                | California            | USA     | B. E. Wolfe   | 12/13/2007 | <i>Corylus cornuta</i> var. <i>californica</i> |
|                              | Albany Hill                      | AP: AlbanyHill2007_1    | Albany                | California            | USA     | B. E. Wolfe   | 12/13/2007 | <i>Quercus agrifolia</i>                       |
|                              | Albion                           | AP: Albion 1            | Albion                | California            | USA     | D. Smith      | 12/1/2007  | <i>Lithocarpus densiflorus</i>                 |
|                              | Altadena                         | AP: LA Victim 1         | Altadena              | California            | USA     | N. Wilson     | 4/??/2003  | <i>Quercus</i> sp.                             |
|                              | Alumni House                     | AP: ecv 2861            | Berkeley              | California            | USA     | E.C. Vellinga | 8/22/2002  | <i>Quercus agrifolia</i>                       |
|                              | Alumni House                     | AP: D. Nyugen           | Berkeley              | California            | USA     | D. Nyugen     | 6/21/2004  | <i>Quercus agrifolia</i>                       |
|                              | Alumni House                     | AP: Alumni House A 2004 | Berkeley              | California            | USA     | A. Pringle    | 12/2/2004  | <i>Quercus agrifolia</i>                       |
|                              | Aptos Vista                      | AP: AV 1                | Aptos                 | California            | USA     | A. Pringle    | 12/14/2006 | <i>Quercus</i> sp.                             |
|                              | Barker Hall                      | AP: Barker 6/9/04       | Berkeley              | California            | USA     | A. Pringle    | 6/9/2004   | <i>Quercus agrifolia</i>                       |
|                              | Barker Hall                      | AP: Barker 10/22/04     | Berkeley              | California            | USA     | A. Pringle    | 10/22/2004 | <i>Quercus agrifolia</i>                       |
|                              | Barker/Koshland Hall             | AP: ecv 2860            | Berkeley              | California            | USA     | E.C. Vellinga | 8/22/2002  | <i>Quercus agrifolia</i>                       |
|                              | Berkeley Hills                   | AP: ecv 2984            | Berkeley              | California            | USA     | E.C. Vellinga | 1/6/2003   | <i>Quercus agrifolia</i>                       |
|                              | Birge Hall                       | AP: ecv 2979            | Berkeley              | California            | USA     | E.C. Vellinga | 1/3/2003   | <i>Quercus agrifolia</i>                       |
|                              | China Camp                       | AP: ecv 2983            | Santa Venetia         | California            | USA     | E.C. Vellinga | 1/4/2003   | <i>Quercus kelloggii</i>                       |
|                              | China Camp - Ranger Station      | AP: ecv 2980            | Santa Venetia         | California            | USA     | E.C. Vellinga | 1/4/2003   | <i>Quercus agrifolia</i>                       |
|                              | China Camp - Back Branch Meadows | AP: RP CCSP             | Santa Venetia         | California            | USA     | R. Pastorino  | 12/31/2002 | <i>Quercus agrifolia</i>                       |
|                              | Cool                             | AP: Cool 2007           | Cool                  | California            | USA     | D. Veiss      | 12/25/2007 | <i>Quercus</i> sp.                             |

**Table S1: (continued)**

|                                           |                             |                     |            |     |               |            |                          |
|-------------------------------------------|-----------------------------|---------------------|------------|-----|---------------|------------|--------------------------|
| Descanso Gardens                          | AP: NJW 055                 | La Crescenta        | California | USA | N. Wilson     | 11/4/2006  | <i>Quercus agrifolia</i> |
| East Dunne Ave (Morgan Hill) Faculty Club | AP: RP 028                  | Morgan Hill         | California | USA | R. Pastorino  | 1/4/2005   | <i>Quercus sp.</i>       |
| Heather's Yard                            | AP: ecv 2862                | Berkeley            | California | USA | E.C. Vellinga | 12/22/2002 | <i>Quercus agrifolia</i> |
| Helen Putnam Regional Park                | AP: HY1                     | Davenport           | California | USA | A. Pringle    | 12/14/2006 | <i>Quercus agrifolia</i> |
| Lake Hennessey                            | AP: RP 027                  | Petaluma            | California | USA | R. Pastorino  | 12/22/2004 | <i>Quercus agrifolia</i> |
| Lake Mendocino                            | AP: RP 023                  | ~ St Helena         | California | USA | R. Pastorino  | 12/20/2004 | <i>Quercus sp.</i>       |
| Los Trancos Preserve                      | AP: Lake Mendocino 1        | Ukiah               | California | USA | B. E. Wolfe   | 12/7/2007  | <i>Quercus agrifolia</i> |
| Lukas Valley                              | † Mushroom Observer 9       | ~ Portola Valley    | California | USA | D. Smith      | 12/16/2007 | <i>Quercus kelloggii</i> |
| Madison Heights                           | AP: HH 1                    | Lukas Valley        | California | USA | P. Werner     | 1/25/2003  | <i>Quercus agrifolia</i> |
| Marin Municipal Water District            | PAP: asadena_Hollinger      | Pasadena            | California | USA | J. Hollinger  | 11/10/08   | <i>Quercus agrifolia</i> |
| Menlo Park                                | AP: RP MMWD                 | near Larkspur       | California | USA | R. Pastorino  | 1/7/2003   | <i>Quercus agrifolia</i> |
| Mt Vision Fire Area                       | AP: ecv 2864                | Menlo Park          | California | USA | E.C. Vellinga | 9/14/2002  | <i>Quercus agrifolia</i> |
| Navarro-Gschwend Road                     | AP: RP PRNP                 | Point Reyes Station | California | USA | R. Pastorino  | 1/3/2003   | <i>Quercus sp.</i>       |
| Oakland Hills                             | AP: RT SOMA                 | Navarro             | California | USA | R. Tulloss    | 1/19/2003  | <i>Quercus agrifolia</i> |
| Pepperwood Nature Reserve                 | AP: DR 3                    | Oakland             | California | USA | D. Rust       | 1/1/2003   | <i>Quercus agrifolia</i> |
| Philo - Goldeneye Production Facility     | AP: ecv 3180                | Santa Rosa          | California | USA | E.C. Vellinga | 12/23/2003 | <i>Quercus sp.</i>       |
| Philo - Sharffenburger Tasting Room       | AP: Philo_Goldeneye1        | Philo               | California | USA | B. E. Wolfe   | 12/6/07    | <i>Quercus agrifolia</i> |
| Pisto House                               | AP: Philo_Scharffenburger_1 | Philo               | California | USA | B. E. Wolfe   | 12/6/07    | <i>Quercus agrifolia</i> |
| Point Reyes, Bishop Pine Stand            | AP: Pisto House             | Monterey            | California | USA | A. Pringle    | 11/16/2004 | <i>Quercus sp.</i>       |
|                                           | AP: KP1                     | Point Reyes Station | California | USA | K. Peay       | 11/16/2006 | <i>Pinus muricata</i>    |

**Table S1: (continued)**

|                                  |                       |                   |                  |        |                    |            |                          |
|----------------------------------|-----------------------|-------------------|------------------|--------|--------------------|------------|--------------------------|
| Reagle Ranch Regional Park       | AP: ecv 3286          | Sebastapol        | California       | USA    | E.C. Vellinga      | 11/19/04   | <i>Quercus agrifolia</i> |
| San Juan Canyon Rd.              | AP: RP 031            | San Jaun Bautista | California       | USA    | R. Pastorino       | 1/4/2005   | <i>Quercus</i> sp.       |
| Sierra Foothills Research Center | ‡ Morris ITS Sequence | Browns Valley     | California       | USA    | Morris et al. 2008 | 4/20/04    | <i>Quercus wislizeni</i> |
| Skyline Park                     | AP: RP 025            | ~ Napa            | California       | USA    | R. Pastorino       | 12/20/2004 | <i>Quercus agrifolia</i> |
| Suisun Reservoir                 | AP: RP 012            | Green Valley      | California       | USA    | R. Pastorino       | 12/16/2004 | <i>Quercus</i> sp.       |
| Valley Life Sciences Building    | AP: ecv 2978          | Berkeley          | California       | USA    | E.C. Vellinga      | 1/3/2003   | <i>Quercus</i> sp.       |
| Tennessee Valley (Mill Valley)   | AP: RP TV             | Mill Valley       | California       | USA    | R. Pastorino       | 1/8/2003   | <i>Quercus</i> sp.       |
| Tilden Park                      | AP: JBA               | Berkeley          | California       | USA    | J. Baruzzi         | 1/5/2003   | <i>Quercus agrifolia</i> |
| Tilden Regional Park             | AP: ecv 2977          | Berkeley          | California       | USA    | E.C. Vellinga      | 1/1/2003   | <i>Quercus agrifolia</i> |
| Tolman Hall                      | AP: Else_TolmanHall   | Berkeley          | California       | USA    | E.C. Vellinga      | 10/10/2002 | <i>Pinus canariensis</i> |
| Tomales Bay State Park           | AP: RP TBSP J         | Inverness         | California       | USA    | R. Pastorino       | 1/3/2003   | <i>Pinus muricata</i>    |
| Toro County Park                 | AP: RP 030            | ~ Spreckels       | California       | USA    | R. Pastorino       | 1/4/2005   | <i>Quercus</i> sp.       |
| UC Berkeley RSF                  | AP: UCB RSF           | Berkeley          | California       | USA    | R. Adams           | 5/15/2005  | <i>Quercus</i> sp.       |
| Upper Crystal Springs Reservoir  | AP: ecv 2959          | Highlands         | California       | USA    | E.C. Vellinga      | 12/23/02   | <i>Quercus agrifolia</i> |
| Upper Crystal Springs Reservoir  | AP: ecv 2960          | Highlands         | California       | USA    | E.C. Vellinga      | 12/23/02   | <i>Quercus agrifolia</i> |
| East Main St, Medford, OR        | AP: Medford, OR       | Medford           | Oregon           | USA    | G. Larum           | 10/25/1998 | <i>Betula</i> sp.        |
| Victoria - Budget Rent a Car     | DAVFP 26776           | Victoria          | British Columbia | Canada | J. Dennis          | 10/13/2002 | <i>Carpinus betulus</i>  |
| Mission, BC                      | DAVFP 25388           | Mission           | British Columbia | Canada | T. Tatum           | 10/19/1997 | <i>Castanea sativa</i>   |
| Victoria-Government House        | DAVFP 25415           | Victoria          | British Columbia | Canada | J. Howe            | 11/5/1998  | <i>Fagus</i> sp.         |

**Table S1: (continued)**

|                                |                                |                       |                 |                  |        |             |            |                      |
|--------------------------------|--------------------------------|-----------------------|-----------------|------------------|--------|-------------|------------|----------------------|
|                                | Mary S Young State Park        | AP: WL1               | West Linn       | Oregon           | USA    | B. Sostrin  | 10/15/2004 | <i>Picea</i> sp.     |
|                                | Mt St Helens Place South       | ST99-276-01           | Seattle         | Washington       | USA    | S. Trudell  | 1999       | <i>Quercus rubra</i> |
|                                | BC Poisoning - Vickery         | DAVFP 27399           | Victoria        | British Columbia | Canada | B. Callan   | 8/20/2003  | <i>Quercus rubor</i> |
|                                | Victoria – Uplands             | DAVFP 25731           | Victoria        | British Columbia | Canada | J. Dennis   | 9/13/2000  | <i>Tilia</i> sp.     |
|                                | Victoria - Budget Rent a Car   | DAVFP 26775           | Victoria        | British Columbia | Canada | J. Dennis   | 10/13/2002 | <i>Tilia</i> sp.     |
| <b>Northeast United States</b> | Franconia Notch                | AP: White Mountains   | Franconia Notch | New Hampshire    | USA    | B. E. Wolfe | 8/26/2008  | <i>Abies</i> sp.     |
|                                | Durand-Eastma Park             | AP: Durand Eastman    | Irondequoit     | New York         | USA    | B. E. Wolfe | 10/2/2006  | <i>Abies</i> sp.     |
|                                | White Plains                   | NYBG 45955            | White Plains    | New York         | USA    | L. Shernoff | 10/3/1988  | <i>Fagus</i> sp.     |
|                                | Irvington                      | NYBG 45954            | Near Irvington  | New York         | USA    | S. Ristich  | 11/2/1976  | <i>Picea abies</i>   |
|                                | Kinesco Dam                    | NYBG 46014            | Valhalla        | New York         | USA    | S. Stein    | 11/11/1989 | <i>Picea abies</i>   |
|                                | Nockamixon State Park          | AP: MMK 1             | Quakertown      | Pennsylvania     | USA    | M. M. Kyde  | 11/5/2002  | <i>Picea rubens</i>  |
|                                | Rt. 202                        | AP: RT 202 1995       | Bernardsville   | New Jersey       | USA    | S. Hopkins  | 10/15/1995 | <i>Picea abies</i>   |
|                                | Webster Park                   | AP: Webster 1-2       | Webster         | New York         | USA    | B. E. Wolfe | 10/1/2006  | <i>Picea</i> sp.     |
|                                | Round Valley Recreational Area | AP: Strobus "9"       | Lebanon         | New Jersey       | USA    | B. E. Wolfe | 10/7/2006  | <i>Picea</i> sp.     |
|                                | Bob Peabody                    | AP: Peabody           | Milford         | New Jersey       | USA    | B. E. Wolfe | 10/6/2006  | <i>Pinus strobus</i> |
|                                | Great River LI RR              | AP: Great River       | Great River     | New York         | USA    | P. Sadowski | 11/18/2009 | <i>Pinus strobus</i> |
|                                | Jake's Landing Rd              | AP: JLR 2             | Dennisville     | New Jersey       | USA    | B. E. Wolfe | 10/21/2006 | <i>Pinus strobus</i> |
|                                | MackWorth Island               | RET 287-10            | Falmouth        | Maine            | USA    | L. Leonards | 10/15/1998 | <i>Pinus strobus</i> |
|                                | Mendon Ponds Park              | AP: Mendon Ponds Park | Mendon Center   | New York         | USA    | J. Johnston | 11/4/2009  | <i>Pinus</i> sp.     |
|                                | Olney Manor Park               | AP: Olney             | Olney, MD       | New Jersey       | USA    | R. LaSala   | 10/25/2006 | <i>Pinus strobus</i> |

**Table S1: (continued)**

|               |                                |                    |              |                   |         |                  |            |                         |
|---------------|--------------------------------|--------------------|--------------|-------------------|---------|------------------|------------|-------------------------|
|               | PNC Bank                       | AP: PNC (Susan)    | Oldwick      | New Jersey        | USA     | S. Hopkins       | 10/14/2004 | <i>Pinus strobus</i>    |
|               | Pocomoke River State Park      | RET 0158-9         | Snow Hill    | Maryland          | USA     | L.T. Biechele    | 10/11/1995 | <i>Pinus taeda</i>      |
|               | Round Valley Recreational Area | AP: Strobis "9"    | Lebanon      | New Jersey        | USA     | B. E. Wolfe      | 10/7/2006  | <i>Pinus</i> sp.        |
|               | Wavenly Park                   | NYBG 45956         | New Canann   | Connecticut       | USA     | T. Fox           | 10/13/1979 | <i>Pinus</i> sp.        |
|               | Durand-Eastma Park             | AP: Durand Eastman | Irondequoit  | New York          | USA     | B. E. Wolfe      | 10/3/2006  | <i>Pinus</i> sp.        |
|               | Durand-Eastma Park             | AP: Durand Eastman | Irondequoit  | New York          | USA     | B. E. Wolfe      | 10/1/2006  | <i>Quercus rubra</i>    |
|               | Hackettstown                   | NYBG 45957         | Hackettstown | New Jersey        | USA     | R. Peabody       | 10/15/1978 | <i>Tsuga canadensis</i> |
|               | Durand-Eastma Park             | AP: Durand Eastman | Irondequoit  | New York          | USA     | B. E. Wolfe      | 10/3/2006  | <i>Tsuga canadensis</i> |
| <b>Europe</b> | Sønderskoven                   | C 12354            | Vejle        | East Jutland      | Denmark | Ronald Toft      | 10/1/1989  | <i>Fagus</i> sp.        |
|               | Åbenrå                         | C 17725            | Åbenrå       | Southeast Jutland | Denmark | Ronald Toft      | 8/15/1989  | <i>Quercus</i> sp.      |
|               | Hørhaven                       | C 17842            | Århus        | East Jutland      | Denmark | Jan Vesterholt   | 9/5/1987   | <i>Fagus</i> sp.        |
|               | Staksrode Skov                 | C 17843            | Vejle        | East Jutland      | Denmark | J. Vesterholt    | 7/24/1990  | <i>Fagus</i> sp.        |
|               | Grimstrup Krat                 | C 17844            | Esbjerg      | Southwest Jutland | Denmark | Jan Vesterholt   | 9/17/1990  | <i>Quercus</i> sp.      |
|               | Hørhaven                       | C 17845            | Århus        | East Jutland      | Denmark | Jan Vesterholt   | 11/3/1983  | <i>Fagus</i> sp.        |
|               | Kolding                        | C 21277            | Kolding      | East Jutland      | Denmark | Jan Vesterholt   | 9/17/1990  | <i>Fagus</i> sp.        |
|               | Lolland                        | C 41913            | Lolland      | Lolland           | Denmark | Jan Vesterholt   | 10/10/2000 | <i>Fagus</i> sp.        |
|               | Leikanger                      | C 42268            | Leikanger    | Vestlandet        | Norway  | Jan Vesterholt   | 9/11/2000  | <i>Corylus</i> sp.      |
|               | Farum                          | AP: DMark1         | Farum        | Hovedstaden       | Denmark | T. Læssøe        | 9/17/2003  | <i>Fagus sylvatica</i>  |
|               | Södermanland                   | S F19599           | Södermanland | Södertälje        | Sweden  | Klas Jaederfeldt | 8/27/2001  | <i>Quercus</i> sp.      |
|               | Blidö                          | S F5526            | Uppland      | Blidö             | Sweden  | Anders Tehler    | 9/14/1997  | <i>Corylus avellana</i> |

**Table S1: (continued)**

|                                  |                  |                   |                      |          |                       |            |                         |
|----------------------------------|------------------|-------------------|----------------------|----------|-----------------------|------------|-------------------------|
| Vatteville                       | FPCHND (Observ.) | Forêt de Brotonne | Haute-Normandie      | France   | Jean-Claude Malalaval | 26/09/1997 | <i>Fagus sylvatica</i>  |
| Woodwalton Fen                   | FRDBI 1211443    | Ramsey Heights    | Hutingdonshire       | England  | N. Jarvis             | 9/9/2006   | <i>Quercus robur</i>    |
| Siccaridge Wood                  | FRDBI 1212557    | Frampton Mansell  | East Gloucestershire | England  | J. Roberts            | 8/8/2006   | <i>Fagus sylvatica</i>  |
| Buckholt Wood                    | FRDBI 1212565    | Cranham           | East Gloucestershire | England  | D. Shorten            | 9/2/2006   | <i>Fagus sylvatica</i>  |
| Vernditch Chase: Gardiner Forest | FRDBI 1236801    | Vernditch Chase   | South Wiltshire      | England  | N.W. Legon            | 10/7/2006  | <i>Fagus sylvatica</i>  |
| Norbury Park                     | FRDBI 1237387    | Mickleham         | Surrey               | England  | N.W. Legon            | 10/23/2006 | <i>Fagus sylvatica</i>  |
| Vann Lake Reserve                | FRDBI 1237472    | Ockley            | Surrey               | England  | N.W. Legon            | 10/24/2006 | <i>Quercus</i> sp.      |
| Cockney's Wood                   | FRDBI 1237637    | Kemsing           | West Kent            | England  | N.W. Legon            | 10/29/2006 | <i>Carpinus betulus</i> |
| Dorton's Wood                    | FRDBI 1250168    | Selbourne         | North Hampshire      | England  | S. Rogerson           | 10/22/2006 | <i>Fagus sylvatica</i>  |
| High Crag Wood                   | FRDBI 1251868    | Witherslack       | Westmorland          | England  | S.M. Weir             | 8/28/2006  | <i>Betula</i> sp.       |
| Humphrey Head Wood               | FRDBI 1251967    | Lancashire        | Westmorland          | England  | S.M. Weir             | 10/7/2006  | <i>Quercus</i> sp.      |
| Pembrokeshire                    | FRDBI 1307862    | -                 | Pembrokeshire        | Wales    | NI                    | 6/30/1909  | <i>Fagus</i> sp.        |
| Walton Common                    | FRDBI 1343388    | Walton in Gordano | North Somerset       | England  | R.G. Betts            | 7/22/2007  | <i>Quercus</i> sp.      |
| Newbold Revel                    | FRDBI 1425458    | Newbold Revel     | Warwick              | England  | J.D. Sells            | 11/2/2006  | <i>Fagus sylvatica</i>  |
| Hollowhill Wood                  | FRDBI 1446736    | Marlow            | Buckinghamshire      | England  | A.M. Ainsworth        | 8/20/2008  | <i>Fagus sylvatica</i>  |
| Crickley Hill, Scrubbs Wood      | FRDBI 1448482    | Crickley Hill     | East Gloucestershire | England  | J. Roberts            | 9/14/2008  | <i>Fagus sylvatica</i>  |
| Lineover Wood                    | FRDBI 1448485    | Dowdeswell        | East Gloucestershire | England  | D. Champion           | 9/14/2008  | <i>Quercus robur</i>    |
| Bourley, double reservoir        | FRDBI 1454418    | Ewshot            | North Hampshire      | England  | D.H. Dell             | 10/4/2007  | <i>Fagus sylvatica</i>  |
| Birks of Aberfeldy               | FRDBI 1466583    | -                 | Perth and Kinross    | Scotland | E. Holden             | 9/17/2008  | <i>Fagus sylvatica</i>  |
| Epping Forest-Three Forests Way  | FRDBI 1470942    | Epping            | South Essex          | England  | A.S. Overall          | 9/16/2007  | <i>Quercus robur</i>    |

**Table S1: (continued)**

|                     |               |                     |            |         |                   |            |                      |
|---------------------|---------------|---------------------|------------|---------|-------------------|------------|----------------------|
| Puttenham Common    | FRDBI 1472337 | Farnham             | Surrey     | England | A.S. Overall      | 9/28/2008  | <i>Quercus robur</i> |
| Klein-Feiting       | GJO 0001613   | Klein-Feiting       | Steiermark | Austria | H. Kahr           | 7/27/1998  | <i>Quercus</i> sp.   |
| St. Marein bei Graz | GJO 0007214   | St. Marein bei Graz | Steiermark | Austria | H. Kahr           | 10/14/2003 | <i>Quercus</i> sp.   |
| Rainerkogel         | GJO 0010232   | Rainerkogel         | Steiermark | Austria | C. Weißhaupt      | 9/6/1989   | <i>Pinus</i> sp.     |
| St. Veit            | GJO 0010235   | St. Veit            | Steiermark | Austria | H. Pidlich-Aigner | 9/25/1998  | <i>Quercus</i> sp.   |
| Stockerwald         | GJO 0010237   | Stockerwald         | Steiermark | Austria | H. Kahr           | 9/16/1989  | <i>Quercus</i> sp.   |
| Wundschuh           | GJO 0010238   | Wundschuh           | Steiermark | Austria | M. Kincel         | 9/14/1989  | <i>Quercus</i> sp.   |
| Görlitz             | GLM F007161   | Görlitz             | Bundesland | Germany | O. Augsten        | 7/26/1980  | <i>Quercus</i> sp.   |
| Görlitz-Biesnitz    | GLM F014615   | Görlitz-Biesnitz    | Bundesland | Germany | H. Gottschalk     | 9/12/1985  | <i>Betula</i> sp.    |
| Görlitz-Biesnitz    | GLM F032942   | Görlitz-Biesnitz    | Bundesland | Germany | -                 | 9/21/1994  | <i>Fagus</i> sp.     |
| Berlin-Altglienicke | GLM F039609   | Berlin-Altglienicke | Berlin     | Germany | -                 | 7/24/1998  | <i>Quercus</i> sp.   |
| Berlin-Altglienicke | GLM F041159   | Berlin-Altglienicke | Berlin     | Germany | -                 | 10/15/1998 | <i>Quercus</i> sp.   |
| Görlitz-Weinhübe    | GLM F044379   | Görlitz-Weinhübe    | Bundesland | Germany | -                 | 9/28/2001  | <i>Quercus rubra</i> |
| Kodersdorf Bahnhof  | GLM F045032   | Kodersdorf Bahnhof  | Saxony     | Germany | -                 | 9/22/2002  | <i>Quercus</i> sp.   |
| Kreba               | GLM F045112   | Kreba               | Saxony     | Germany | -                 | 10/30/2002 | <i>Tilia cordata</i> |
| Herrnhut            | GLM F045203   | Herrnhut            | Saxony     | Germany | -                 | 8/28/2002  | <i>Fagus</i> sp.     |
| Herrnhut            | GLM F045203   | Herrnhut            | Saxony     | Germany | -                 | 8/28/2002  | <i>Quercus</i> sp.   |
| Bad Gottleuba       | GLM F052086   | Bad Gottleuba       | Saxony     | Germany | -                 | 9/8/2002   | <i>Quercus</i> sp.   |
| Görlitz-Klingewalde | GLM F070318   | Görlitz-Klingewalde | Bundesland | Germany | -                 | 9/5/2005   | <i>Quercus</i> sp.   |
| Zeltplatz Pähnitz   | GLM F071709   | Altenburg           | Thuringia  | Germany | -                 | 8/7/1984   | <i>Quercus</i> sp.   |
| Kragerø             | HBO 53849     | Kragerø             | Telemark   | Norway  | T.E. Brandrud     | 9/14/92    | <i>Quercus</i> sp.   |
| Kragerø             | HBO 53852     | Kragerø             | Telemark   | Norway  | T.E. Brandrud     | 9/7/1985   | <i>Quercus</i> sp.   |

**Table S1: (continued)**

|                                   |           |                       |                 |             |               |            |                         |
|-----------------------------------|-----------|-----------------------|-----------------|-------------|---------------|------------|-------------------------|
| Kragerø                           | HBO 53853 | Kragerø               | Telemark        | Norway      | T.E. Brandrud | 9/7/1983   | <i>Quercus</i> sp.      |
| Tingvoll                          | HBO 65378 | Tingvoll              | Møre og Romsdal | Norway      | G. Gaarder    | 9/4/2001   | <i>Corylus</i> sp.      |
| Arendal                           | HBO 70024 | Arendal               | Aust-agder      | Norway      | G. Gulden     | 9/13/1994  | <i>Quercus</i> sp.      |
| Stams                             | IB 67/27  | Stams                 | Tirol           | Austria     |               | 8/12/1971  | <i>Quercus</i> sp.      |
| Ballenberg                        | IB 77/117 | Hofstetten bei Brienz | Kanton Bern     | Switzerland | M. Moser      | 9/26/77    | <i>Betula</i> sp.       |
| Porquerolles                      | IB 80/610 | Porquerolles          | Provence        | France      | M.Moser       | 11/14/1984 | <i>Quercus ilex</i>     |
| Val di Sella                      | IB 86/187 | Val di Sella          | Trentino        | Italy       | M. Moser      | 9/15/1990  | <i>Fagus</i> sp.        |
| The Marlows                       | K 125036  | The Marlows           | West Sussex     | England     | N.W. Legon    | 9/21/2004  | <i>Fagus sylvatica</i>  |
| Green Dene (nr. West Horsley)     | K 125102  | Sheepleas             | Surrey          | England     | N.W. Legon    | 9/11/2004  | <i>Fagus sylvatica</i>  |
| Cliveden Estate                   | K 127139  | Taplow                | Buckinghamshire | England     | E.W. Brown    | 11/10/2004 | <i>Quercus ilex</i>     |
| Earl's Path (by)                  | K 127561  | Epping Forest         | South Essex     | England     | A.S. Overall  | 10/2/2004  | <i>Quercus robur</i>    |
| Calangianus, Catala               | K 142788  | Calangianus           | Olbia-Tempio    | Italy       | S.E. Evans    | 11/13/2006 | <i>Quercus suber</i>    |
| Hampstead Heath Extension         | K 143723  | Hampstead Heath       | Middlesex       | England     | A.S. Overall  | 10/15/2006 | <i>Carpinus betulus</i> |
| Palsundet                         | K 14741   | Palsundet             | Uppland         | Sweden      | A. Strid      | 8/14/1978  | <i>Corylus avellana</i> |
| Palsundet                         | K 14741   | Palsundet             | Uppland         | Sweden      | A. Strid      | 8/14/1978  | <i>Quercus</i> sp.      |
| Black Spout Wood                  | K 17909   | Pitlochry             | East Perthshire | Scotland    | T. Læssøe     | 9/13/1991  | <i>Quercus</i> sp.      |
| Norbury Park (Mickleham)          | K 30175   | Norbury Park          | Surrey          | England     | N.W. Legon    | 10/2/1994  | <i>Fagus sylvatica</i>  |
| The Warburg Reserve               | K 40662   | Bix                   | Oxfordshire     | England     | N.W. Legon    | 10/2/1996  | <i>Fagus sylvatica</i>  |
| Staple Common                     | K 54414   | Staple Common         | South Somerset  | England     | N.W. Legon    | 9/12/1997  | <i>Fagus sylvatica</i>  |
| Royal Botanic Gardens             | K 59130   | Kew                   | Surrey          | England     | N.W. Legon    | 10/19/1998 | <i>Quercus ilex</i>     |
| Great Breach Wood                 | K 62347   | Great Breach Wood     | North Somerset  | England     | N.W. Legon    | 10/14/1998 | <i>Fagus sylvatica</i>  |
| The Mens and The Cut Nat. Reserve | K 66952   | Petworth              | West Sussex     | England     | N.W. Legon    | 9/15/1999  | <i>Fagus sylvatica</i>  |



**Table S1: (continued)**

|                                   |            |                         |                |            |                       |            |                                         |
|-----------------------------------|------------|-------------------------|----------------|------------|-----------------------|------------|-----------------------------------------|
| Witley Common                     | K 79131    | Witley Common           | Surrey         | England    | N.W. Legon            | 9/9/2000   | <i>Quercus robur</i>                    |
| Triscombe                         | K 79565    | Quantock Hills          | South Somerset | England    | N.W. Legon            | 9/29/2000  | <i>Fagus sylvatica</i>                  |
| Mildenhall Woods                  | K 79856    | Mildenhall              | West Suffolk   | England    | N.W. Legon            | 10/15/2000 | <i>Fagus sylvatica</i>                  |
| Royal Botanic Gardens, Syon Vista | K 81390    | Kew                     | Surrey         | England    | E.W. Brown            | 11/10/2000 | <i>Quercus ilex</i>                     |
| Inishmakill                       | K 83287    | Castle Archdale         | Fermanagh      | N. Ireland | L. Jalink             | 10/14/2000 | <i>Quercus</i> sp.                      |
| El Pardo                          | MA 25597-1 | El Pardo                | Madrid         | Spain      | A. Díaz               | 12/7/91    | <i>Quercus</i> sp.                      |
| El Pardo                          | MA 28415-1 | El Pardo                | Madrid         | Spain      | V. Rodríguez          | 12/2/90    | <i>Quercus</i> sp.                      |
| Aldea del Fresno                  | MA 30675-1 | Aldea del Fresno        | Madrid         | Spain      | M. Pastrana           | 11/23/92   | <i>Quercus</i> sp.                      |
| Fuente del Fresno                 | MA 30676-1 | Fuente del Fresno       | Madrid         | Spain      | M. Pastrana           | 12/13/91   | <i>Quercus ilex</i>                     |
| Navaluenga                        | MA 33155-1 | Navaluenga              | Ávila          | Spain      | F.D. Calonge          | 11/10/94   | <i>Quercus pyrenaica</i>                |
| Canaverl de Leon                  | MA 33373-1 | Canaverl de Leon        | Huelva         | Spain      | L.R. de la Osa Mateos | 3/29/94    | <i>Quercus ilex subsp. rotundifolia</i> |
| Canaverl de Leon                  | MA 33373-1 | Canaverl de Leon        | Huelva         | Spain      | L.R. de la Osa Mateos | 3/29/94    | <i>Quercus suber</i>                    |
| Els Metges                        | MA 35238-1 | Els Metges              | Girona         | Spain      | O. García Prieto      | 11/8/95    | <i>Pinus</i> sp.                        |
| Villanueva del Pardillo           | MA 36130-1 | Villanueva del Pardillo | Madrid         | Spain      | M. Ruiz               | 12/14/96   | <i>Quercus</i> sp.                      |
| Somiedo                           | MA 38395-1 | Somiedo                 | Asturias       | Spain      | E. Rubio Domínguez    | 6/6/97     | <i>Castanea</i> sp.                     |
| Cenicientos                       | MA 39265-1 | Cenicientos             | Madrid         | Spain      | J.C. Campos           | 5/16/98    | <i>Quercus</i> sp.                      |
| Casa de Campo                     | MA 41954-1 | Casa de Campo           | Madrid         | Spain      | J.C. Campos           | 11/28/99   | <i>Quercus</i> sp.                      |
| Izarra                            | MA 49846-1 | Izarra                  | Álava          | Spain      | C.E. Hermosilla       | 11/25/00   | <i>Fagus</i> sp.                        |
| Izarra                            | MA 49847-1 | Izarra                  | Álava          | Spain      | C.E. Hermosilla       | 11/5/00    | <i>Quercus</i> sp.                      |
| Ronda                             | MA 59536-1 | Ronda                   | Málaga         | Spain      | A. Castro             | 11/20/03   | <i>Quercus rotundifolia</i>             |

**Table S1: (continued)**

|                       |            |                       |                  |        |                     |            |                                           |
|-----------------------|------------|-----------------------|------------------|--------|---------------------|------------|-------------------------------------------|
| Colmenarejo, Conjuero | MA 68019-1 | Colmenarejo, Conjuero | Madrid           | Spain  | F. Prieto           | 11/17/01   | <i>Quercus ilex</i> subsp. <i>ballota</i> |
| Colmenarejo, Conjuero | MA 68021-1 | Colmenarejo, Conjuero | Madrid           | Spain  | F. Prieto           | 10/9/01    | <i>Quercus ilex</i> subsp. <i>ballota</i> |
| Fontecha              | MA 69237-1 | Fontecha              | Álava            | Spain  | J. Sánchez          | 11/23/00   | <i>Quercus</i> sp.                        |
| Roppe                 | MCVE 10208 | Roppe                 | Pordenone        | Italy  | G. Zecchin          | 8/22/2000  | <i>Corylus avellana</i>                   |
| Recoaro Terme         | MCVE 10419 | Recoaro Terme         | Vicenza          | Italy  | L. Filippi          | 8/27/2000  | <i>Abies</i> sp.                          |
| Ronca                 | MCVE 10445 | Ronca                 | Verona           | Italy  | F. Braggion         | 9/1/2000   | <i>Corylus avellana</i>                   |
| Carpenedo             | MCVE 1141  | Carpenedo             | Venezia          | Italy  | L. Levorato         | 10/17/1997 | <i>Cedrus</i> sp.                         |
| Lovea                 | MCVE 3077  | Lovea                 | Udine            | Italy  | A. Pergolini        | 9/19/1997  | <i>Fagus sylvatica</i>                    |
| Barcis                | MCVE 4821  | Barcis                | Pordenone        | Italy  | F. Milanese         | 9/8/1998   | <i>Fagus</i> sp.                          |
| Losie                 | MCVE 5586  | Losie                 | Pordenone        | Italy  | G. Zecchin          | 8/10/1998  | <i>Corylus avellana</i>                   |
| Barcis                | MCVE 5594  | Barcis                | Pordenone        | Italy  | G. Zecchin          | 7/31/1998  | <i>Fagus</i> sp.                          |
| Osse                  | MPU        | Osse                  | Franche-Comte    | France | F. Enjalbert et al. | 9/26/93    | <i>Corylus avellana</i>                   |
| Gros Bois             | MPU        | Gros Bois             | Franche-Comte    | France | F. Enjalbert et al. | 9/26/93    | <i>Fagus sylvatica</i>                    |
| Deschaux              | MPU        | Deschaux              | Franche-Comte    | France | F. Enjalbert et al. | 9/28/94    | <i>Fagus sylvatica</i>                    |
| Naisey                | MPU        | Naisey                | Franche-Comte    | France | F. Enjalbert et al. | 9/22/93    | <i>Picea abies</i>                        |
| Bjorvatn NR           | O 169976   | Birkenes              | Aust-Agder       |        | T.E. Brandrud       | 9/8/1999   | <i>Quercus</i> sp.                        |
| Bjorvatn NR           | O 169976   | Birkenes              | Aust-Agder       |        | T.E. Brandrud       | 9/8/1999   | <i>Tilia</i> sp.                          |
| Kansdal               | O 223390   | Tingvoll              | Møre og Romsdal  | Norway | G. Gaarder          | 9/20/2003  | <i>Corylus avellana</i>                   |
| Rislå                 | O 270594   | Birkenes              | Aust-Agder       | Norway | I.L. Fonneland      | 9/4/2002   | <i>Tilia</i> sp.                          |
| Trosvik               | O 53850    | Porsgrunn             | Telemark         | Norway | T.E. Brandrud       | 9/13/1992  | <i>Quercus</i> sp.                        |
| Aurland               | O 60342    | Aurland               | Sogn of Fjordane | Norway | A.E. Torkelsen      | 10/6/1997  | <i>Betula</i> sp.                         |
| Aurland               | O 60342    | Aurland               | Sogn of Fjordane | Norway | A.E. Torkelsen      | 10/6/1997  | <i>Corylus</i> sp.                        |

**Table S1: (continued)**

|                                      |               |             |                      |        |               |           |                                         |
|--------------------------------------|---------------|-------------|----------------------|--------|---------------|-----------|-----------------------------------------|
| Sogndal                              | O 60984       | Sogndal     | Sogn of Fjordane     | Norway | T.E. Brandrud | 10/5/1997 | <i>Corylus</i> sp.                      |
| Sogndal                              | O 60984       | Sogndal     | Sogn of Fjordane     | Norway | T.E. Brandrud | 10/5/1997 | <i>Tilia</i> sp.                        |
| Jobberget naturreservat edelløvsskog | O 63728       | Granvin     | Hordaland            | Norway | G. Flatabø    | 9/26/1997 | <i>Tilia</i> sp.                        |
| Jobberget naturreservat edelløvsskog | O 63728       | Granvin     | Hordaland            | Norway | G. Flatabø    | 9/26/1997 | <i>Betula</i> sp.<br><i>Quercus</i> sp. |
| Kråkerøy                             | O 63944       | Fredrikstad | Østfold              | Norway | I.L. Østmoe   | 8/12/2000 | <i>Quercus</i> sp.                      |
| Bjørnskorneset I lindeskog           | O 65379       | Stryn       | Sogn of Fjordane     | Norway | G. Gaarder    | 9/9/2001  | <i>Tilia</i> sp.                        |
| Lauvvikane                           | O 66274       | Stranda     | Møre og Romsdal      | Norway | D. Holtan     | 9/6/2003  | <i>Pinus</i> sp.                        |
| Bringa, Stranda Rike hasselkratt     | O 66290       | Stranda     | Møre og Romsdal      | Norway | D. Holtan     | 9/13/2003 | <i>Corylus</i> sp.                      |
| Steiggjelet                          | O 66332       | Norrdal     | Møre og Romsdal      | Norway | D. Holtan     | 8/29/2003 | <i>Pinus</i> sp.<br><i>Quercus</i> sp.  |
| Grimstad                             | O 70093       | Grimstad    | Aust-Agder           | Norway | G. Gulden     | 9/11/1994 | <i>Quercus</i> sp.                      |
| Puechabon Experimental Forest        | FR: Puechabon | Lavene      | Languedoc-Roussillon | France | F. Richard    | NI        | <i>Quercus ilex</i>                     |
| Obedska Bara Nature Reserve          | AP: Serb 1    | Obrez       | Vojvodina            | Serbia | Anne Pringle  | 10/6/2007 | <i>Carpinus betulus</i>                 |

\* Letters for each specimen indicate the source herbarium for the material, as is reported by Index Herbariorum, except for the following: AP: = in collection of Dr. Anne Pringle's lab, Harvard University; FR: = Communicated by Franck Richard, C.N.R.S Centre d'Ecologie Fonctionnelle et Evolutive, Montpellier, France; FPCHND = Fungi-Protozoa-Chromista de Haute-Normandie Database provided by JeanClaude Malalaval; FRDBI = Fungal Redcords Database of Britain and Ireland (available at <http://www.fieldmycology.net/>); RET = personal herbarium of Dr. Rodham Tulloss (<http://www.eticomm.net/~ret/amanita/mainaman.html>).

†'Mushroom Observer 9' is a report with photographic documentation from the website Mushroom Observer ([mushroomobserver.org](http://mushroomobserver.org)).

‡ 'Morris ITS Sequence' is based on an ITS sequence generated from an *Amanita phalloides* root tip from the following paper: Morris, M.H., Smith, M.E., Rizzo, D.M., Rejmanek, M. & Bledsoe, C.S. (2008). Contrasting ectomycorrhizal fungal communities on the roots of co-occurring oaks (*Quercus* spp.) in a California woodland. *New Phytol.*, 178, 167-176.
