# Supplementary material
Source: PubMed Central journal article supplement (PMC3309363)

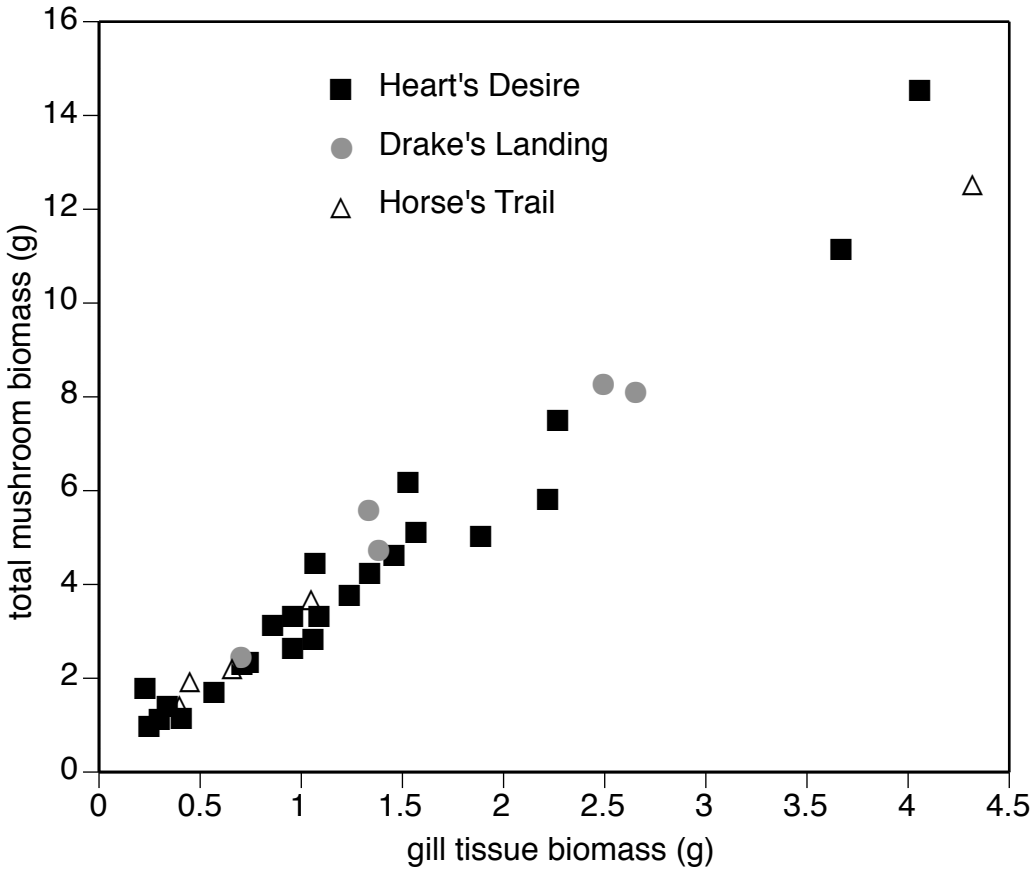

Supplement: ismej2011155x1.pdf [file ismej2011155x1.pdf]
